# Supplementary material
Source: Springer Nature journal article supplement (https://www.springermedizin.de/resource/supplementary/12890_2014_562_MOESM2_ESM.pdf/9505316)
Supplement: MOESM2 [file 9505316]

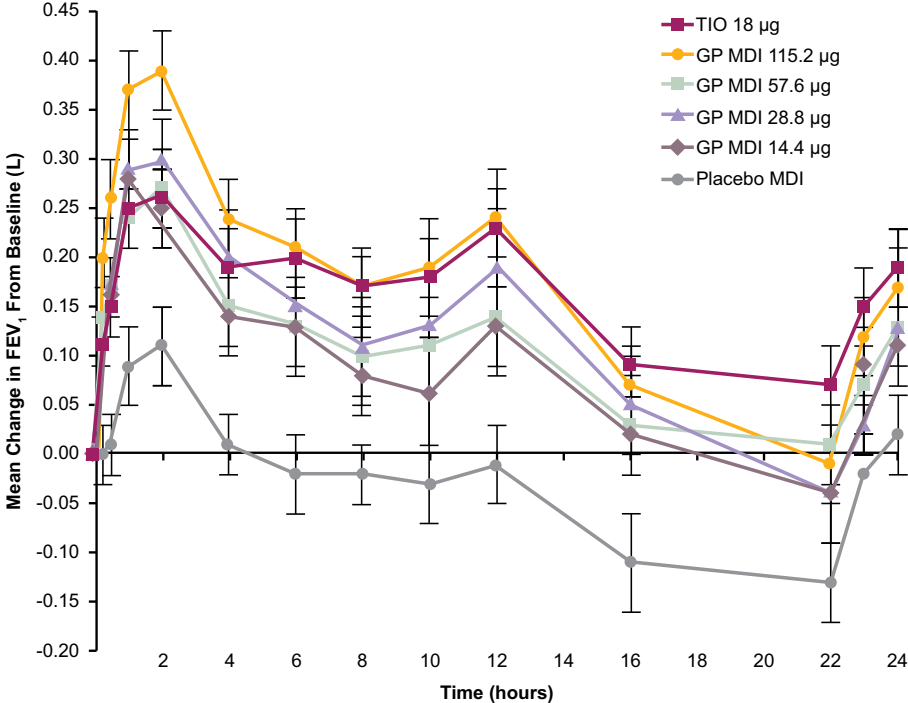

FEV<sub>1</sub>=forced expiratory volume in 1 second; GP MDI=glycopyrronium metered-dose inhaler; Tio=tiotropium.
